# Supplementary material for: miR-34a-5p targets Foxp1 to promote osteoclast differentiation and accelerate fracture healing
Source: Research Square preprint supplement (doi:10.21203/rs.3.rs-7121624/v1), 2025-07-22
Supplement: Supplementary file 1 [file 9addb635a5bb2e6d34eb3164.docx]

**
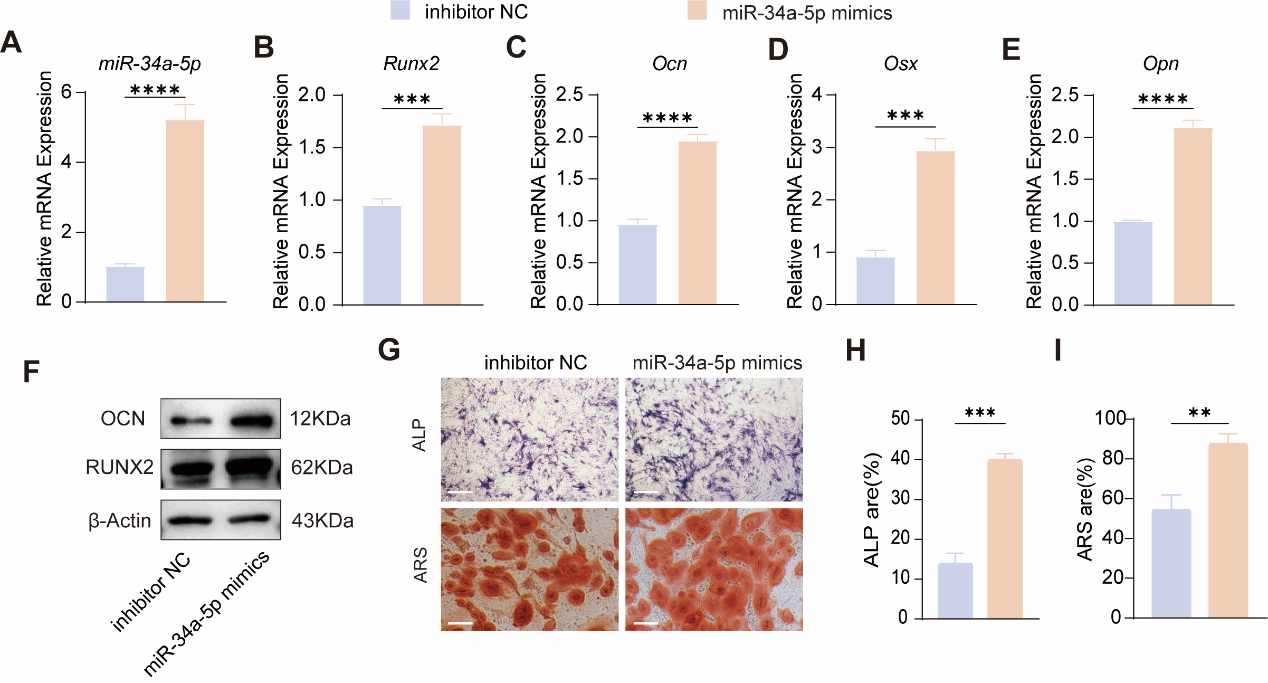
**

**Supplementary Figure 1** miR-34a-5p promotes osteoblast differentiation, and its mimics enhance this process. **A–E** mRNA expression levels of *miR-34a-5p*, *Runx2*, *Ocn*, *Osx*, and *Opn*, quantified using qPCR in the groups treated with NC or miR-34a-5p mimics during osteogenic induction in the MC3T3-E1 cell line (n = 6). **F** Western blot analysis of OCN and RUNX2 protein levels in NC inhibitor and miR-34a-5p mimics-treated groups. **G** ALP and ARS staining results in NC inhibitor miR-34a-5p mimics-treated groups to evaluate the ALP activity and the degree of calcification. **H–I** Quantitative analysis of the staining results from **K** (n = 3). Experiments were repeated three times, and the data are presented as mean ± standard deviation. **p < 0.01; ***p < 0.001; ****p < 0.0001 based on a Student’s t-test.

**Table S1. The sequence of gene-specific primers used for qPCR.**

| Gene | primer sequences |
| --- | --- |
| *miR-34a-5p* | F: 5′-GGCCAGCTGTGAGTGTTTCTTTGG-3′ |
| R: 5′-CTCGCTTCATCTTCCCTCTTGGG-3′ |
| *Runx2* | F: 5′-TGTTCTCTGATCGCCTCAGTG-3′ |
| R: 5′-CCTGGGATCTGTAATCTGACTCT-3′ |
| *Ocn* | F: 5′-TCTGACAAAGCCTTCATGTCCA-3′ |
| R: 5′-CGGTCTTCAAGCCATACTGGTC-3′ |
| *Opn* | F: 5′-TCACCATTCGGATGAGTCTG-3′ |
| R: 5′-ACTTGTGGCTCTGATGTTCC-3′ |
| *Osx* | F: 5′-CCCACCCTTCCCTCACTCAT-3′ |
| R: 5′-CCTTGTACCACGAGCCATAGG-3′ |
| *Ctsk* | F:5’-TAGCCACGCTTCCTATCCGA-3’ |
| R:5’-CCTCCGGAGACAGAGCAAAG-3’ |
| *Nfatc1* | F:5’-CTTCGAGTTCGATCAGAGCGG-3’ |
| R:5’-AGGGTCGAGGTGACACTAGG-3’ |
| *Trap* | F:5’-CACTCCCACCCTGAGATTTGT-3’ |
| R:5’-CATCGTCTGCACGGTTCTG-3’ |
| *C-fos* | F:5’-TGTTCCTGGCAATAGCGTGT-3’ |
| R:5’-TCAGACCACCTCGACAATGC-3’ |
| *Mmp9* | F:5’-CCCTGGAACTCACACGACAT-3’ |
| R:5’-TGGTTCACCTCATGGTCCAC-3’ |
| *β-actin* | F:5’-GGCTGTATTCCCCTCCATCG-3’ |
| R:5’-CCAGTTGGTAACAATGCCATGT-3’ |
